# Supplementary material for: A glowing antioxidant from tasar silk cocoon
Source: Royal Society of Chemistry journal article supplement (doi:10.1039/c5ra14148f), 2015-01-01
Supplement: c5ra14148f1.pdf [file c5ra14148f1.pdf]

## Supplementary information

### A Glowing Antioxidant From Tasar Silk Cocoon

Tejas Sanjeev Kusurkar<sup>1Δ</sup>, Anamika Gangwar<sup>2Δ</sup>, Mangesh Bawankar<sup>3</sup>, Anupam Mandal<sup>4</sup>, Dattatraya Dethe<sup>4</sup>, Ashwani Kumar Thakur<sup>3</sup>, Sushil Kumar Singh<sup>5</sup>, Kalpana Bhargava<sup>2</sup>, Sukant Khurana<sup>6</sup>, Niroj Kumar Sethy<sup>2\*</sup>, Mainak Das<sup>1,7\*</sup>

<sup>1</sup>Bio-electricity, Green Energy, Physiology & Sensor Group, Biological Sciences & Bioengineering, Indian Institute of Technology Kanpur, Kanpur, Uttar Pradesh, 208016, India

<sup>2</sup>Peptide and Proteomics Division, Defense Institute of Physiology and Allied Sciences, Defense Research Development Organization, Timarpur, Delhi, 110054, India

<sup>3</sup>Biological Sciences & Bioengineering, Indian Institute of Technology Kanpur, Kanpur, Uttar Pradesh, 208016, India

<sup>4</sup>Department of Chemistry, Indian Institute of Technology Kanpur, Kanpur, Uttar Pradesh, 208016, India

<sup>5</sup>Functional Materials Group, Solid State Physics Laboratory, Defense Research Development Organization, Timarpur, Delhi, 110054, India

<sup>6</sup>Department of Biological Sciences, Indian Institute of Science Education and Research Kolkata, Mohanpur, West Bengal, 741246, India

<sup>7</sup>Design Program, Indian Institute of Technology Kanpur, Kanpur, Uttar Pradesh, 208016, India

Δ TSK and AG has contributed equally for this work

\* NKS and MD are co-corresponding authors. All queries and request for reprints should be addressed to MD. Email: mainakd@iitk.ac.in, FAX: +91-512-2594010

### Fourier transform infrared (FT-IR) spectroscopy:

Fourier transform infrared (FT-IR) spectroscopy of both quercetin and fluorophore showed similar absorbance in the region of aromatic C-H loop, alcohol C-O, aromatic C-C and alkene C=C bonds<sup>R1,R2</sup>.

This analysis supported the presence of aromatic compounds in the fluorophore (**Fig. S1**).

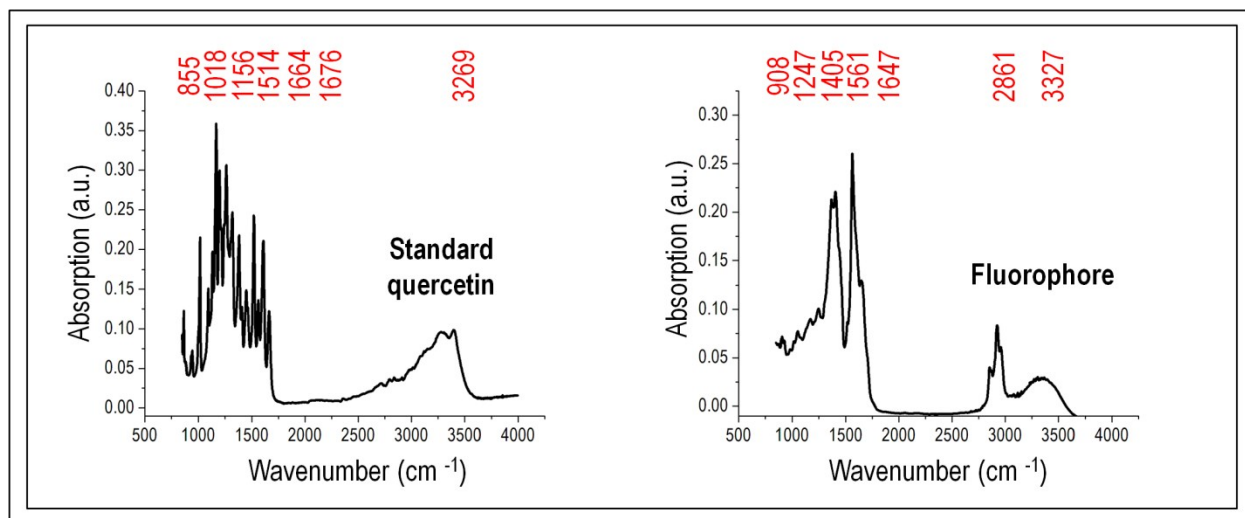

**Figure S1.** FT-IR spectroscopy of fluorophore and pure quercetin showing similar peaks in the region of aromatic C-H, C-C bond and alcohols.

## References

- R1. S. Y. Kim, J. J. Gao, W. C. Lee, K. S. Ryu, K. R. Lee and Y. C. Kim, *Arch. Pharm. Res.*, 1999, **22**, 81.
- R2. Y. Han, S. Nishibe, Y. Noguchi and Z. Jin, *Phytochemistry*, 2001, **58**, 577.
